# Supplementary material
Source: PubMed Central journal article supplement (PMC2651325)
Supplement: 0813280106_0813280106SI.pdf [file 0813280106_0813280106SI.pdf]

# Supporting Information

Hu et al. 10.1073/pnas.0813280106

**Table S1. Characteristics of patients and outcome of treatment**

| Patients                                            | No. of patients | CR, no. (%) | Median time to CR, days (range) | 5-year OS     | 5-year EFS    |
|-----------------------------------------------------|-----------------|-------------|---------------------------------|---------------|---------------|
| All                                                 | 85              | 80 (94.1)   | 27 (15–38)                      | 91.7% ± 3.0%  | 89.2% ± 3.4%  |
| Age, y                                              |                 |             |                                 |               |               |
| <15                                                 | 2               | 2 (100)     | 24.5 (21–28)                    | 100%          | 100%          |
| 15–55                                               | 69              | 66 (95.7)   | 27 (15–38)                      | 92.7% ± 3.2%  | 89.6% ± 3.7%  |
| >55                                                 | 14              | 12 (85.7)   | 27.5 (18–38)                    | 85.7% ± 9.4%  | 85.7% ± 9.4%  |
| <i>P</i>                                            |                 | 0.288       | 0.642                           | 0.691         | 0.793         |
| Sex                                                 |                 |             |                                 |               |               |
| Male                                                | 47              | 44 (93.6)   | 27 (15–38)                      | 91.4% ± 4.1%  | 89.4% ± 4.5%  |
| Female                                              | 38              | 36 (94.7)   | 27.5 (15–38)                    | 92.1% ± 4.4%  | 89.2% ± 5.1%  |
| <i>P</i>                                            |                 | 1.000       | 0.541                           | 0.851         | 0.954         |
| WBC per $\mu$ L                                     |                 |             |                                 |               |               |
| <5,000                                              | 56              | 52 (92.9)   | 27 (15–38)                      | 91% ± 3.8%    | 89.3% ± 4.1%  |
| <10,000                                             | 10              | 10 (100)    | 28 (23–38)                      | 100%          | 100%          |
| $\geq$ 10,000                                       | 19              | 18 (94.7)   | 27 (21–34)                      | 89.2% ± 7.2%  | 83.2% ± 8.9%  |
| <i>P</i>                                            |                 | 1.000       | 0.815                           | 0.400         | 0.443         |
| <i>PML-RAR<math>\alpha</math></i> ( <i>n</i> = 75)* |                 |             |                                 |               |               |
| L                                                   | 48              | 45 (93.8)   | 28 (15–38)                      | 91.5% ± 4.1%  | 91.6% ± 4.0%  |
| S                                                   | 24              | 24 (100)    | 27 (19–35)                      | 91.7% ± 8.0%  | 90.8% ± 6.2%  |
| V                                                   | 3               | 2 (66.7)    | 24 (21–27)                      | 66.7% ± 27.2% | 66.7% ± 27.2% |
| <i>P</i>                                            |                 | 0.095       | 0.160                           | 0.167         | 0.278         |
| <i>FLT3</i> ( <i>n</i> = 50)                        |                 |             |                                 |               |               |
| WT                                                  | 40              | 40 (100)    | 27 (15–38)                      | 97.5% ± 2.5%  | 92.5% ± 4.2%  |
| Mutant                                              | 10              | 10 (100)    | 25 (21–30)                      | 100%          | 100%          |
| <i>P</i>                                            |                 |             | 0.305                           | 0.484         | 0.380         |

\**PML-RAR $\alpha$*  isoforms: L, long type; S, short type; V, variant type.

**Table S2. Major abnormal findings in laboratory studies of patients in last follow-up compared with healthy donors**

| Events                          | Patients, no. (%) (n = 33) | Healthy controls, no. (%) (n = 39) |
|---------------------------------|----------------------------|------------------------------------|
| Abnormal peripheral blood count |                            |                                    |
| WBC                             | 1 (3.0)                    | 1 (2.6)                            |
| Hemoglobin                      | 1 (3.0)                    | 4 (10.2)                           |
| Platelets                       | 0                          | 1 (2.6)                            |
| Abnormal ECG                    |                            |                                    |
| T-wave change                   | 1 (3.0)                    | 0                                  |
| Right bundle branch block       | 2 (6.1)                    | 1 (2.6)                            |
| Long QT interval                | 0                          | —                                  |
| Abnormal echocardiogram         | 0                          | —                                  |
| Abdominal ultrasound            |                            |                                    |
| Hepatic steatosis               | 7 (21.2)                   | 6 (15.4)                           |
| Liver cysts                     | 2 (6.1)                    | 3 (7.7)                            |
| Cholecystitis                   | 2 (6.1)                    | 1 (2.6)                            |
| Biochemistry                    |                            |                                    |
| Abnormal liver function         | 1 (3.0)                    | 1 (2.6)                            |
| Abnormal renal function         | 0                          | 0                                  |
| Abnormal blood glucose          | 3 (9.1)                    | 2 (5.1)                            |
| Abnormal serum tumor marker*    | 2 (6.1)                    | 1 (2.6)                            |
| Abnormal chest X-ray            | 0                          | 2 (5.1)                            |

\*Mild increase of CEA in a male patient and CA125 in a female patient, respectively. One healthy control had a mild increase of CA125 and CA199. No diagnosis of tumor or cancer was documented in further check-up.
